# Supplementary material
Source: MDPI journal article supplement (https://www.mdpi.com/2075-4701/11/8/1288)
Supplement: s1 [file s1]

# Particle Size Distribution Models for Metallurgical Coke Grinding Products

Laura Colorado-Arango <sup>1</sup>, Juan M. Menéndez-Aguado <sup>2,\*</sup> and Adriana Osorio-Correa <sup>1</sup>

<sup>1</sup> Departamento de Ingeniería Química, Universidad de Antioquia, 050010 Medellín, Colombia; laura.coloradoa@udea.edu.co (L.C.-A.); adriana.osorio@udea.edu.co (A.O.-C.)

<sup>2</sup> Escuela Politécnica de Mieres, Universidad de Oviedo, 33600 Oviedo, Spain; maguado@uniovi.es

\* Correspondence: maguado@uniovi.es; Tel.: +34 985458033

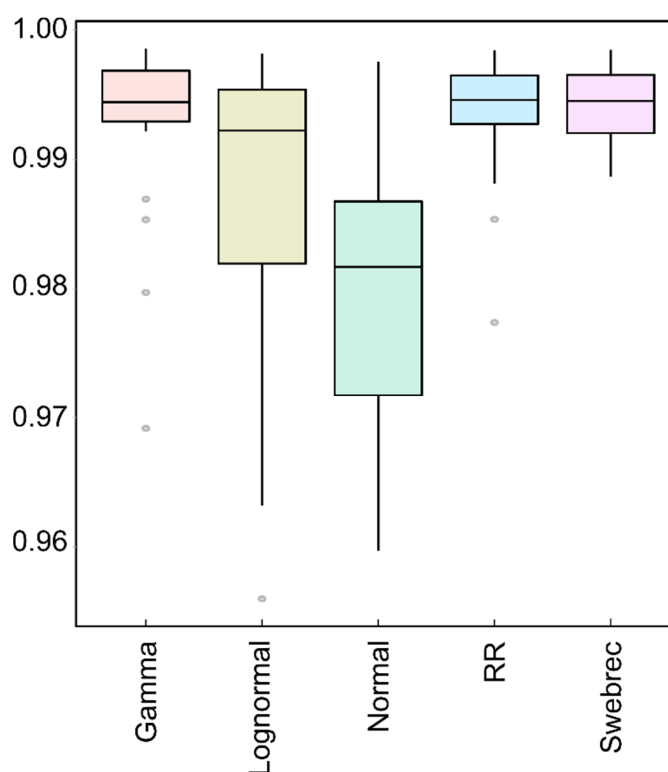

**Figure S1.** Box plot to compare the particle size models base on adjusted  $R^2$  criterion, excluding Gates Gaudin Schuhmann distribution.

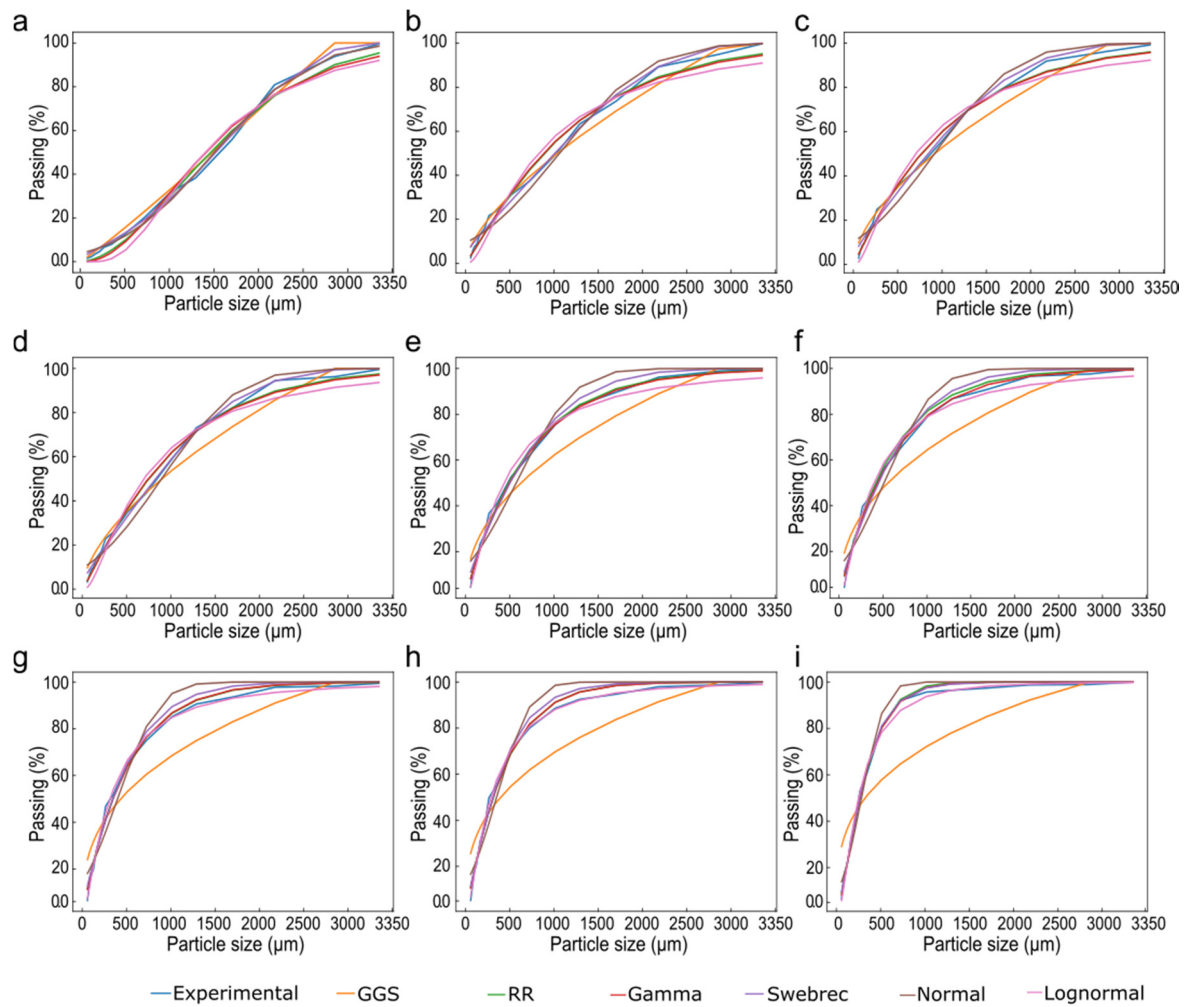

**Figure S2.** Cumulative distribution functions with 2.54 cm ball size, at different grinding times; (a) 0.0 min; (b) 0.5 min; (c) 1.0 min; (d) 2.0 min; (e) 3.0 min; (f) 4.0 min; (g) 5.0 min; (h) 6.0 min; (i) 10 min.

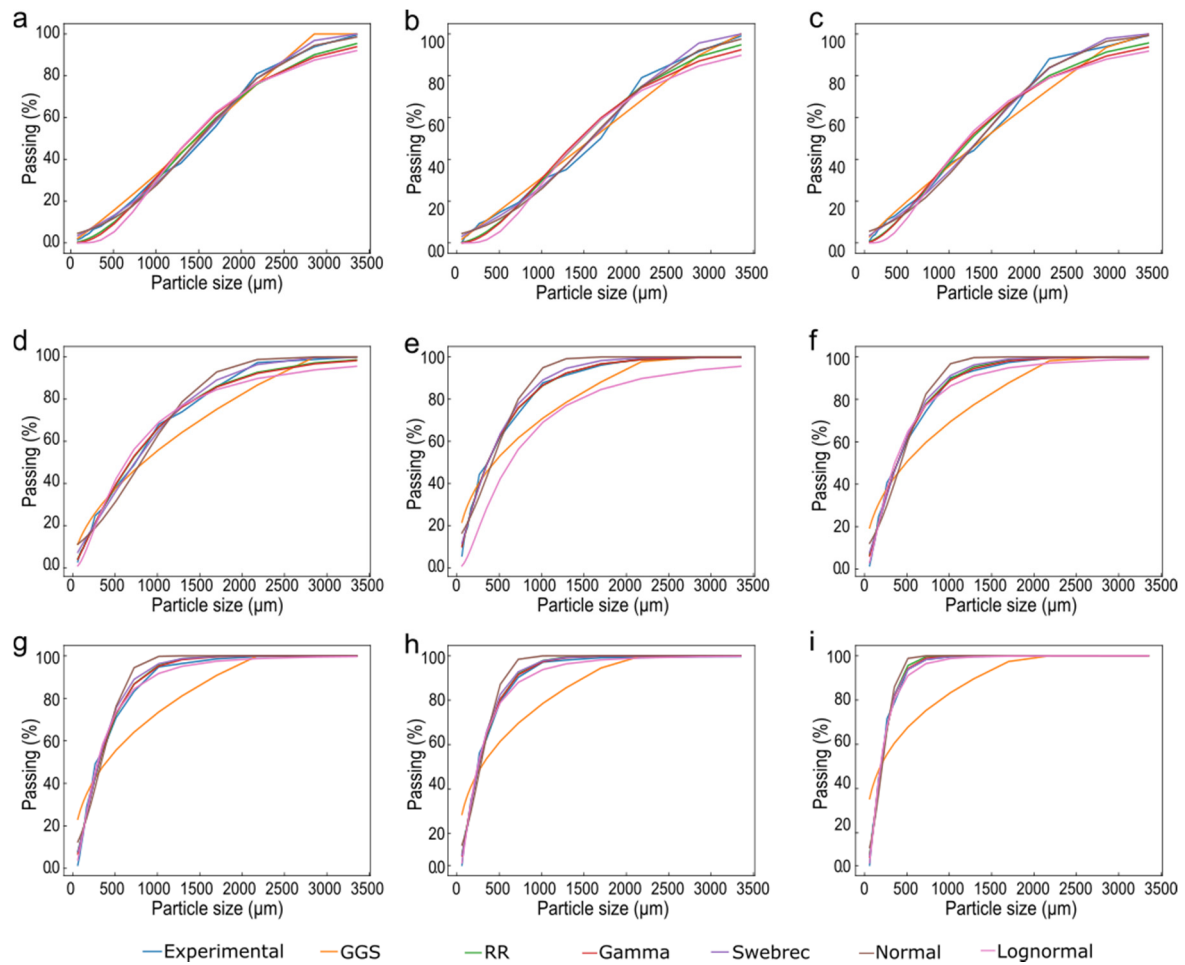

**Figure S3.** Cumulative distribution functions with 4.0 cm ball size, at different grinding times; **(a)** 0.0 min; **(b)** 0.5 min; **(c)** 1.0 min; **(d)** 2.0 min; **(e)** 3.0 min; **(f)** 4.0 min; **(g)** 5.0 min; **(h)** 6.0 min; **(i)** 10 min.

**Table S1.** Statistical descriptors for three criteria.

| Models    | Adjusted R <sup>2</sup> |       |       |         | RMSE   |        |        |        | AIC      |        |         |       |
|-----------|-------------------------|-------|-------|---------|--------|--------|--------|--------|----------|--------|---------|-------|
|           | Min                     | Max   | Mean  | S.d     | Min    | Max    | Mean   | S.d    | Min      | Max    | Mean    | S.d   |
| Gamma     | 0.969                   | 0.999 | 0.993 | 0.00671 | 0.0130 | 0.0626 | 0.0294 | 0.0115 | −127.256 | −88.53 | −112.33 | 10.82 |
| Lognormal | 0.956                   | 0.998 | 0.987 | 0.01976 | 0.0160 | 0.0604 | 0.0326 | 0.0120 | −132.787 | −83.22 | −104.81 | 15.13 |
| Normal    | 0.960                   | 0.998 | 0.982 | 0.01090 | 0.0253 | 0.0907 | 0.0576 | 0.0173 | −119.028 | −83.76 | −94.88  | 9.78  |
| RR        | 0.977                   | 0.998 | 0.994 | 0.00469 | 0.0132 | 0.0444 | 0.0285 | 0.0099 | −126.300 | −93.51 | −112.96 | 8.77  |
| GGS       | 0.724                   | 0.981 | 0.905 | 0.07360 | 0.0417 | 0.1779 | 0.1074 | 0.0423 | −96.040  | −51.89 | −71.94  | 13.91 |
| Swebrec   | 0.989                   | 0.999 | 0.996 | 0.00246 | 0.0162 | 0.0557 | 0.0331 | 0.0116 | −124.090 | −99.12 | −111.0  | 7.07  |

**Table S2.** Custom script to determine fitting parameter by least square method.

```

#Call libraries
import numpy as np
import matplotlib.pyplot as plt
import pandas as pd

#Import dataset
xl=pd.ExcelFile('Balls_3cm.xlsx') #dataset employing ball sizes of 3cm
#
#Name x,y values
xdata=df['Diameter'] #Particle size diameter (mm)
ydata=df['M2.0'] #Cumulative undersize at 2 min of grinding time(-)

#Chose a model to evaluate (Rosin Rammler case)
def model(xdata,coeffs):
    return 1-np.exp(-np.power((xdata/coeffs[0]),coeffs[1]))

#Initial guess
x0=np.array([246.73165778,4.8654162],dtype=float)

#Define the objective function
Def residuals(coeffs, y, t):
    Return (y - model(xdata, coeffs))**2

#Least squares method
from scipy.optimize import leastsq

xdata=df['Diameter']
x,flag=leastsq(residuals,x0,args=(ydata, xdata))
print(x)

```
